# Supplementary material for: The PCNA-associated protein PARI negatively regulates homologous recombination via the inhibition of DNA repair synthesis
Source: PubMed Central journal article supplement — Nucleic Acids Res. 2016 Jan 20;44(7):3176–89. doi: 10.1093/nar/gkw024 (PMC4838361; doi:10.1093/nar/gkw024), 2016-01-20
Supplement: supp_gkw024_nar-03173-d-2015-File007.pdf [file supp_gkw024_nar-03173-d-2015-File007.pdf]

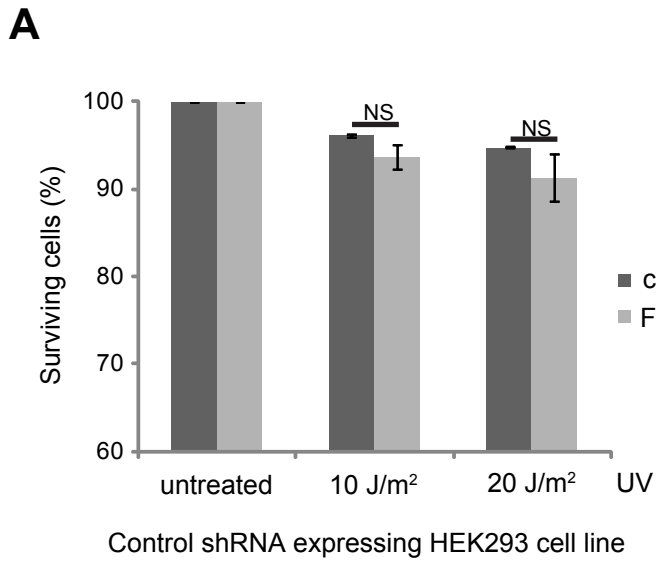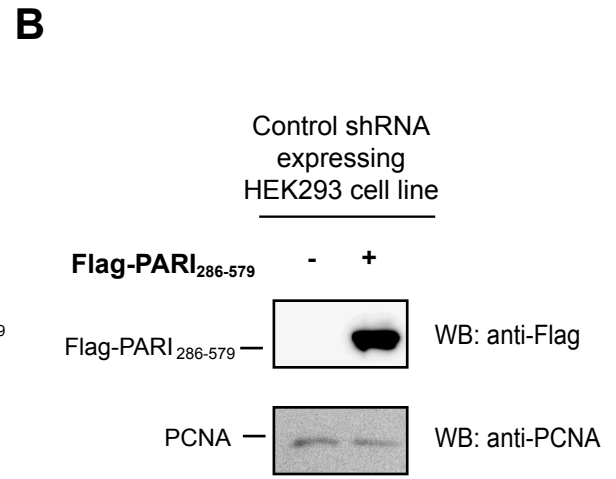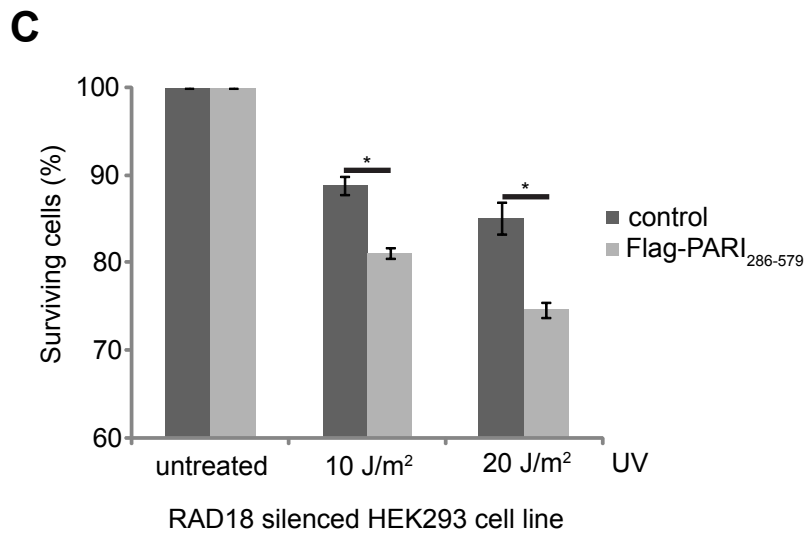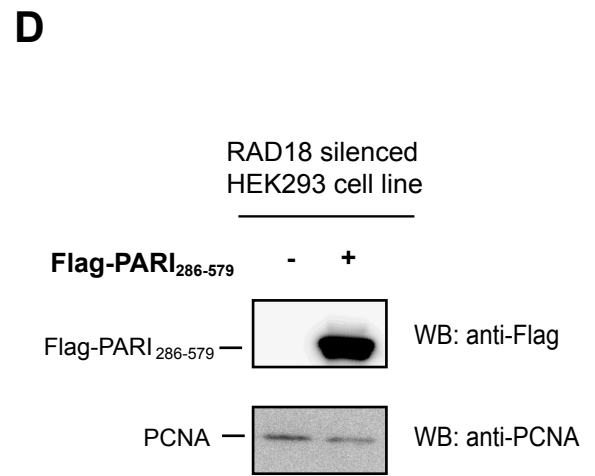

**Supplementary Figure 1**

**A**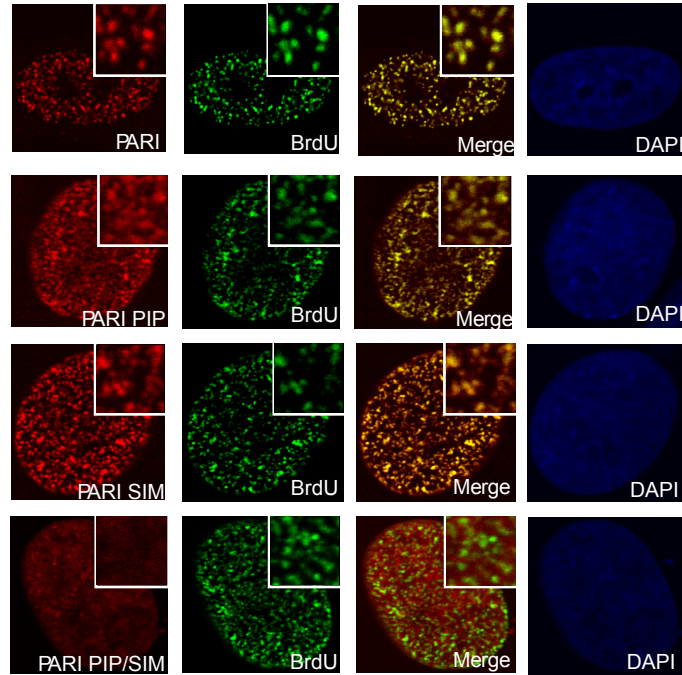**B**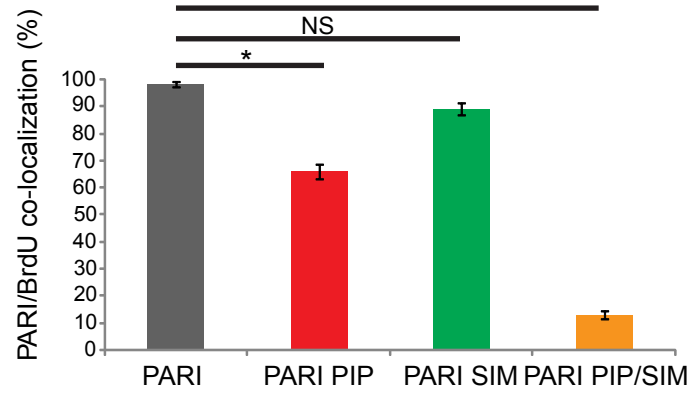**C**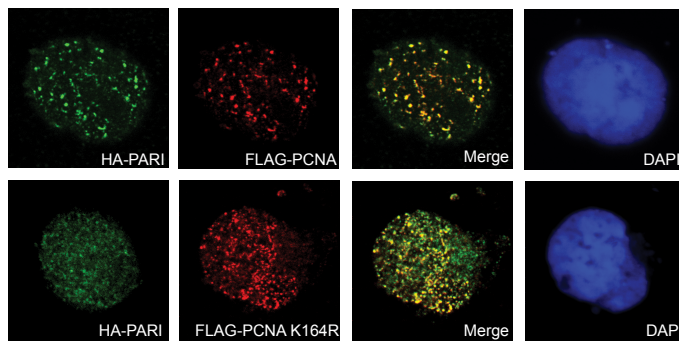**D**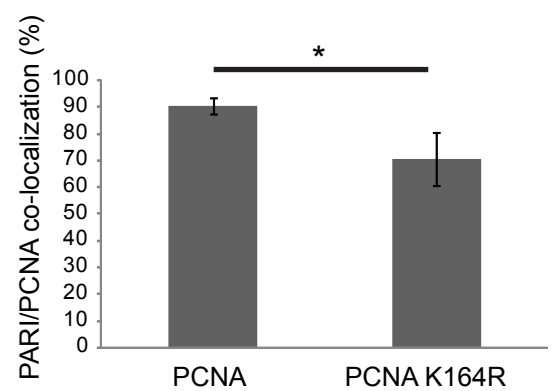**Supplementary Figure 2**

**A**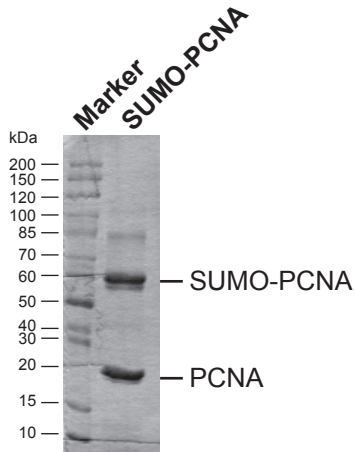**B**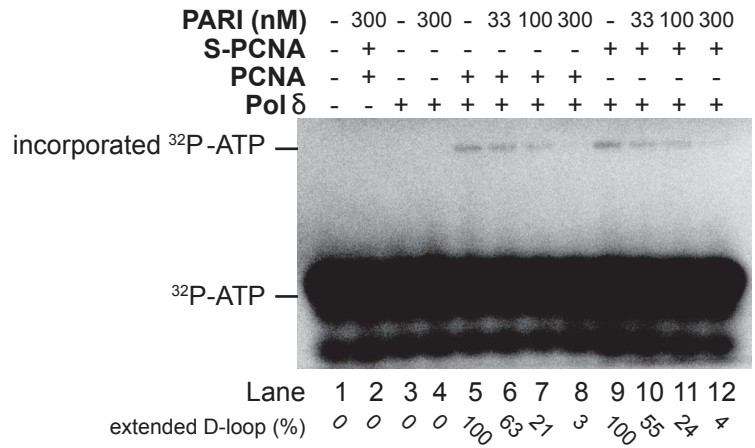**C**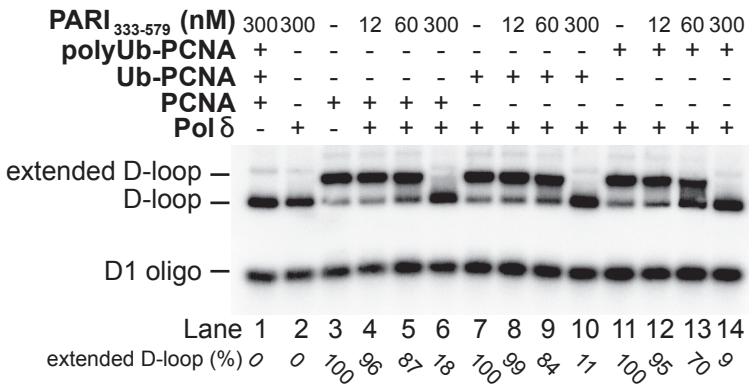**D**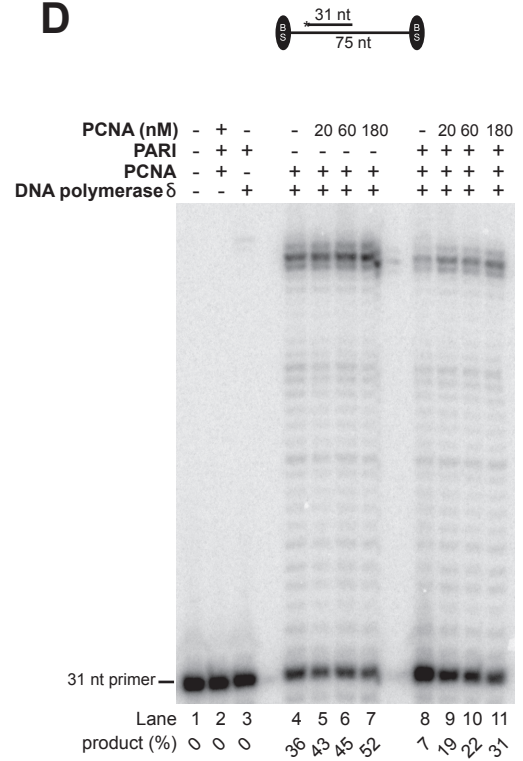**Supplementary Figure 3**

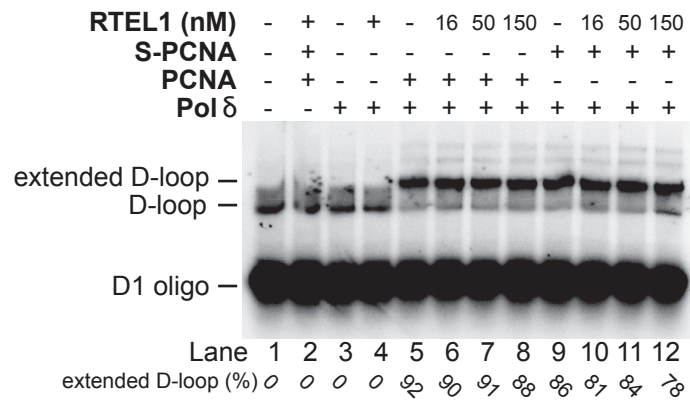

**Supplementary Figure 4**

**A**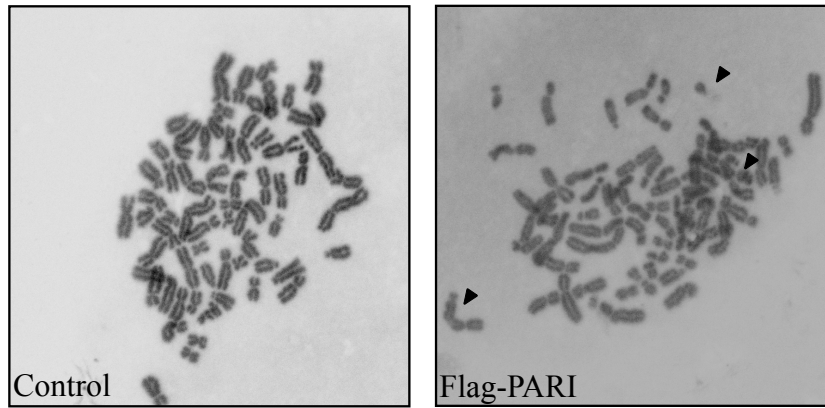**B**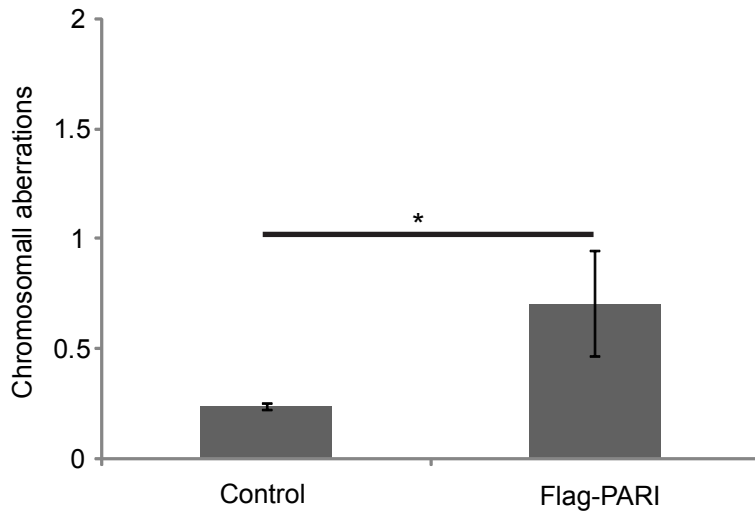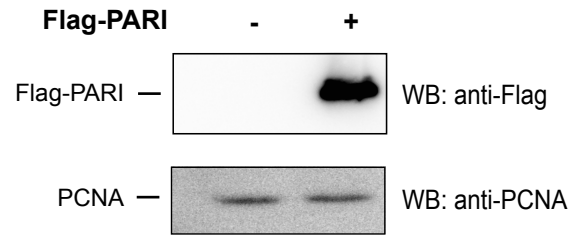**C**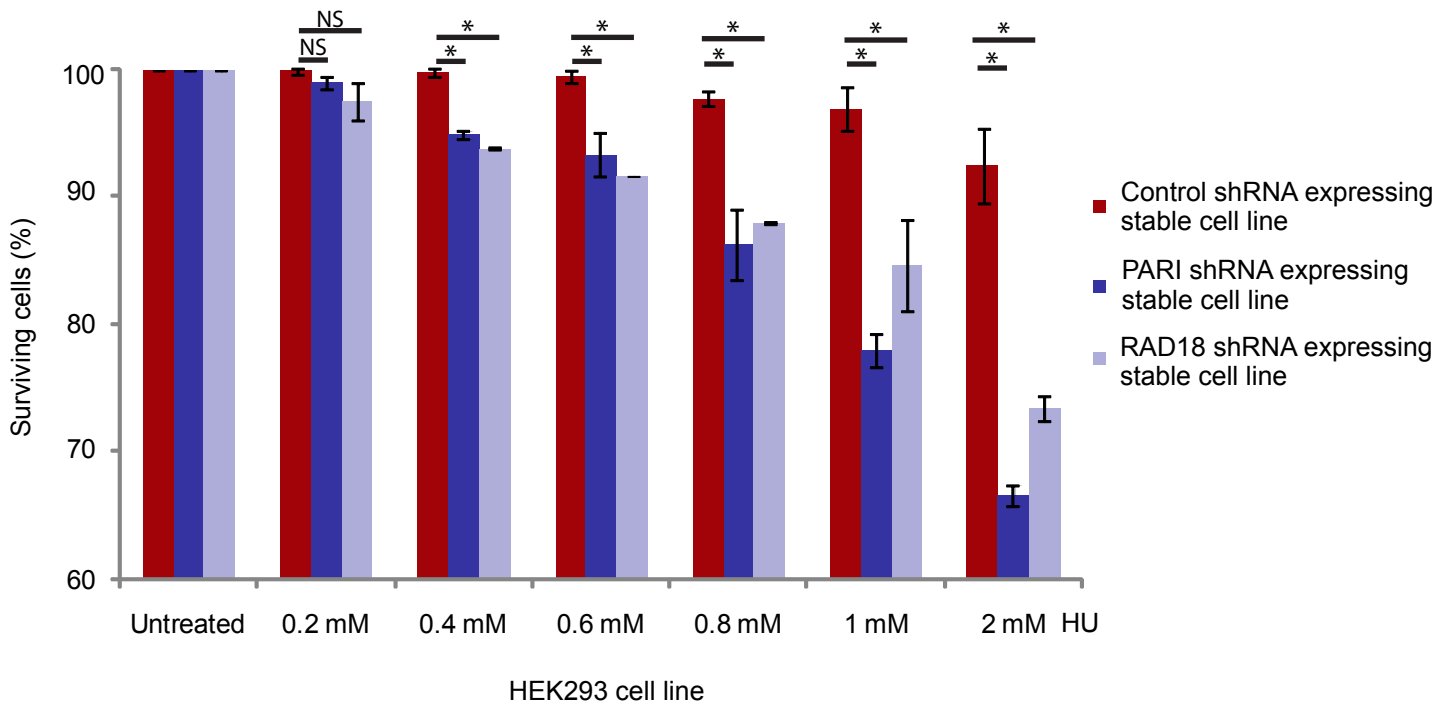**Supplementary Figure 5**

**A**

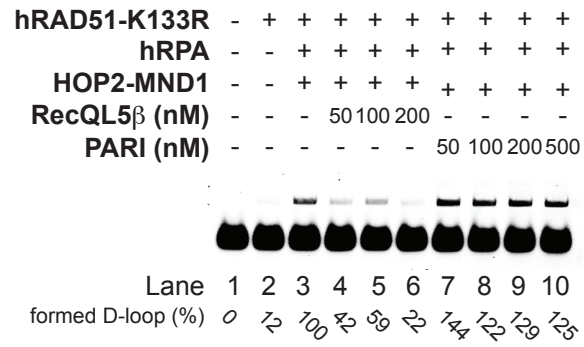

**B**

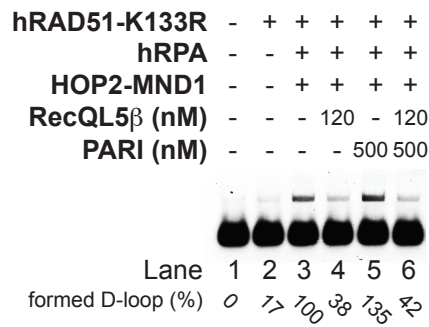

**Supplementary Figure 6**

## Supplementary Materials

### Supplementary figure legends:

**Supplementary Figure 1. *PARI* overexpression sensitizes *RAD18*-depleted cells to UV irradiation.** A) UV sensitivity of the HEK 293 cells after Flag- *PARI*<sub>286-579</sub> overexpression. B) The expression level of Flag-*PARI*<sub>286-579</sub> tested by Western blotting. C) UV sensitivity of *RAD18*-depleted HEK 293 cells after Flag- *PARI*<sub>286-579</sub> overexpression D) The expression level of Flag-*PARI*<sub>286-579</sub> tested by Western blotting. All cell lines were treated with UV; the cells were cultivated for 7 days, and the surviving cells were analyzed by FACS. Mean values of triplicates are shown with SD (error bars). Significant difference is indicated by asterisk.

**Supplementary Figure 2. *The localization of PARI depends on SUMO-PCNA.*** A) Flag-*PARI* and corresponding PIP, SIM, or PIP/SIM mutants were expressed in HEK293 cells. Newly synthesized DNA tracks were labeled by BrdU staining. After fixation, cells were stained using anti-Flag and anti-BrdU antibodies. B) Graphical representation of *PARI* and BrdU co-localizing foci. C) Wild-type HA-*PARI* was expressed together with *PCNA*-specific shRNA and Flag-*PCNA* or Flag-*PCNA* K164R mutant in HEK293 cells. After fixation, the cells were stained using anti-Flag and anti-HA antibodies. D) Graphical representation of the *PARI* and *PCNA* co-localizing foci. Mean values of triplicates are shown with SD (error bars). Significant difference is indicated by asterisk.

**Supplementary Figure 3. *PARI* inhibition does not depend on PTM of *PCNA* and is not exclusively specific for *D*-loop.** A) Purification of SUMO-*PCNA*. B) *PARI*-mediated inhibition of Pol $\delta$ -dependent extension of single primed  $\Phi$ x DNA substrate in the presence of *PCNA* or SUMO-*PCNA*. Reactions were carried out as described in the materials and methods section. C) Effect of *PCNA* ubiquitylation on the inhibitory effect of the *PARI*<sub>333-579</sub> fragment. *In vitro* reactions were carried out as described in Materials and Methods using *PCNA*, monoUb-*PCNA*, and polyUb-*PCNA* (30 nM). Reactions were resolved on a 0.8% native agarose gel.

### **Supplementary Figure 4. *The inhibition of Pol $\delta$ -dependent D-loop extension is specific for PARI.***

Effect of RTEL1 on *D*-loop extension by Pol $\delta$ . All reactions were carried out using radioactively labeled D1 oligonucleotides in the presence of *PCNA* or SUMO-*PCNA* (S-*PCNA*) as indicated. The pre-loaded replication complex was incubated with increasing concentrations of RTEL1, and the extension was

started with the addition of nucleotides to the reactions. All reactions were resolved on 0.8% native agarose gels.

**Supplementary Figure 5. *PARI overexpression causes chromosomal aberrations.*** A) Representative picture of the chromosomes. Arrows indicate the aberrant structures. B) Quantitative analysis of the aberrant chromosomes. Mean values of triplicates are shown with SD (error bars). Significant difference is indicated by asterisk. C) UV sensitivity of the RAD18- and PARI- depleted HEK 293 cells. HEK293 cells were transfected with control, RAD18, or PARI-specific shRNA. All cell lines were treated with HU for 24h; the cells were cultivated for 7 days, and the surviving cells were analyzed by FACS. Mean values of triplicates are shown with SD (error bars). Significant difference is indicated by asterisk.

**Supplementary Figure 6. *PARI doesn't possess anti-recombinase activity.*** A) PARI is not able to displace RAD51 filament. PARI or RECQL5 $\beta$  (as positive control) was incubated with RAD51-coated ssDNA in the presence of RPA. Amount of formed D-loop is indicated. B) The combination of RECQL5 $\beta$  and PARI has no effect on the RECQL5 $\beta$ 's ability to inhibit D-loop formation. PARI, RECQL5 $\beta$ , or their combination was incubated with RAD51-coated ssDNA in the presence of RPA. Amount of formed D-loop is indicated.
